# Supplementary material
Source: PubMed Central journal article supplement (PMC1798435)
Supplement: bj4020219add.pdf [file bj4020219add.pdf]

Supplemental Figure 1

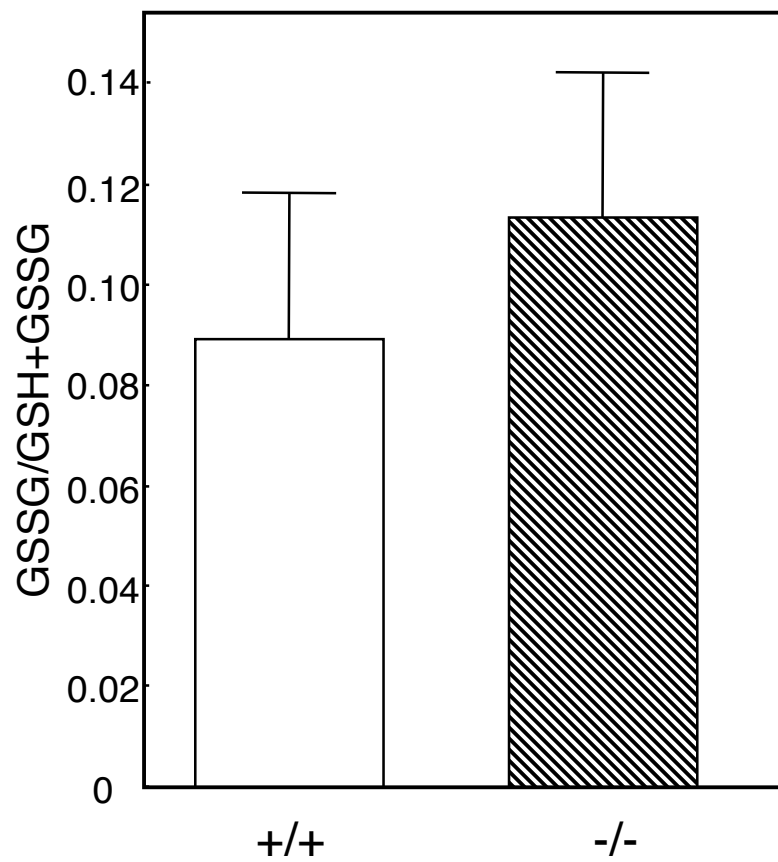

Ratio of oxidized glutathione (GSSG) and total glutathione (GSH+GSSG) in erythrocytes of the blood of *SOD1*<sup>+/+</sup> and *SOD1*<sup>-/-</sup> mice (52-54 weeks, n=2).
